# Supplementary material for: Toxoplasmosis Screening during Pregnancy in a Romanian Infectious Diseases Tertiary Center: Results of a 15 Years Follow-Up Program
Source: MDPI journal article supplement (doi:10.3390/microorganisms11092189), 2023-08-30
Supplement: s1 [file s1]

Patient name\_\_\_\_\_

Patient age\_\_\_\_\_

Child's current age\_\_\_\_\_

1. Age of pregnancy when *Toxoplasma gondii* infection was diagnosed?

Week\_\_\_\_\_

2. Did you follow any treatment? ☐ yes ☐ no

If yes, with: spiramicyn (rovamicyn)? ☐ yes ☐ no

If yes, with: pyrimethamine + sulfadiazine ☐ yes ☐ no

Until the end of the pregnancy? ☐ yes

☐ no, for how long? \_\_\_\_\_

3. Did you give birth to the baby? ☐ yes

☐ no : ☐ spontaneous abortion ☐ induced abortion

4. Amniocentesis for *Toxoplasma* performed? ☐ yes ☐ no

5. Was the birth on term? ☐ yes ☐ no

If not, in which week? \_\_\_\_\_

6. Baby's weight at birth? \_\_\_\_\_

Child's current weight?\_\_\_\_\_

7. APGAR score at birth? \_\_\_\_\_

8. Was there a transfontanel ultrasound performed on the baby? ☐ yes ☐ no

9. Was there an ophthalmological exam performed? ☐ yes ☐ no

10. Was there an auditory exam performed? ☐ yes ☐ no

11. Did the child receive any treatment for toxoplasmosis? ☐ yes ☐ no

If yes, with what? \_\_\_\_\_

the duration of treatment? \_\_\_\_\_

12. Was the child tested for toxoplasmosis during its first year of life? ☐ yes ☐ no

If yes, frequency? \_\_\_\_\_ and results \_\_\_\_\_

13. Does the child have visual impairment? ☐ yes ☐ no

If yes, what? \_\_\_\_\_

Ophthalmological diagnosis \_\_\_\_\_

14. Does the child have any heart problems? ☐ yes ☐ no

If yes, diagnosis \_\_\_\_\_

15. Does the child have any neurological problems? ☐ yes ☐ no

If yes, what? \_\_\_\_\_

Neurological diagnosis \_\_\_\_\_

Has/had hydrocephalus? ☐ yes ☐ no

16. Does the child have any psychiatric problems?

If yes, what? \_\_\_\_\_

Psychiatric diagnosis \_\_\_\_\_

17. Does the child have any liver problems? ☐ yes ☐ no

If yes, diagnosis \_\_\_\_\_

18. Disease diagnoses from birth to present?

---

---

---

---

---
